# Supplementary material for: Easy-fabrication and low-cost carbamate-based porous organic polymers for efficient removal of methylene blue
Source: Royal Society of Chemistry journal article supplement (doi:10.1039/d3nj03866a), 2023-01-01
Supplement: d3nj03866a1.pdf [file d3nj03866a1.pdf]

**Supplementary Information for:**

**Easy-fabrication and low-cost carbamate-based Porous organic polymers for efficient removal of methylene blue**

Yunze Chen<sup>a, †</sup>, Haodong Dai<sup>a, †</sup>, Anjie Dong<sup>a</sup> and Jianhua Zhang<sup>a,b,\*</sup>

<sup>a</sup>Department of Polymer Science and Engineering, Key Laboratory of Systems Bioengineering (Ministry of Education), School of Chemical Engineering and Technology, Tianjin University, Tianjin 300350, China.

<sup>b</sup>Tianjin Key Laboratory of Membrane Science and Desalination Technology, Tianjin University, Tianjin 300350, China.

Corresponding author: Jianhua Zhang, *E-mail*: [jhuazhang@tju.edu.cn](mailto:jhuazhang@tju.edu.cn)

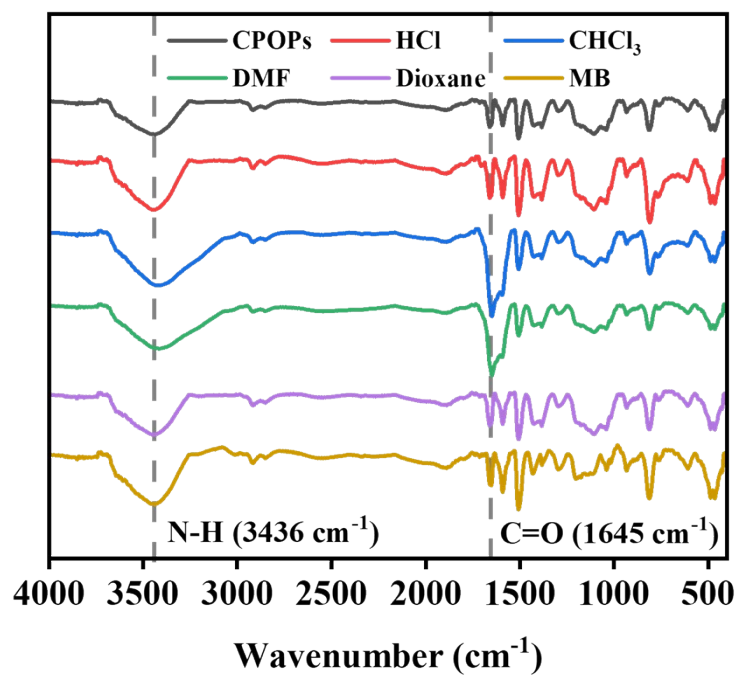

**Fig. S1** FTIR spectra of CPOPs after treatment with HCl (pH=2), CHCl<sub>3</sub>, *N,N*-Dimethylformamide (DMF), Dioxane and MB solution (after washing by ethanol) for 24h

**Table S1** Elemental analysis of CPOPs

| Element    | C     | O     | H   | N    |
|------------|-------|-------|-----|------|
| Weight (%) | 65.90 | 20.62 | 3.6 | 9.88 |

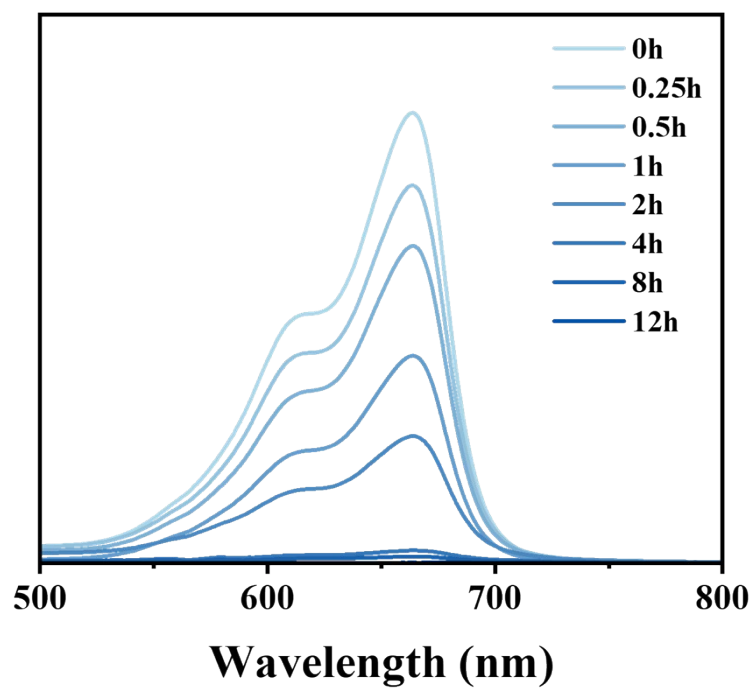

**Fig. S2** UV-visible spectra of MB residue solution with the increase of absorption time

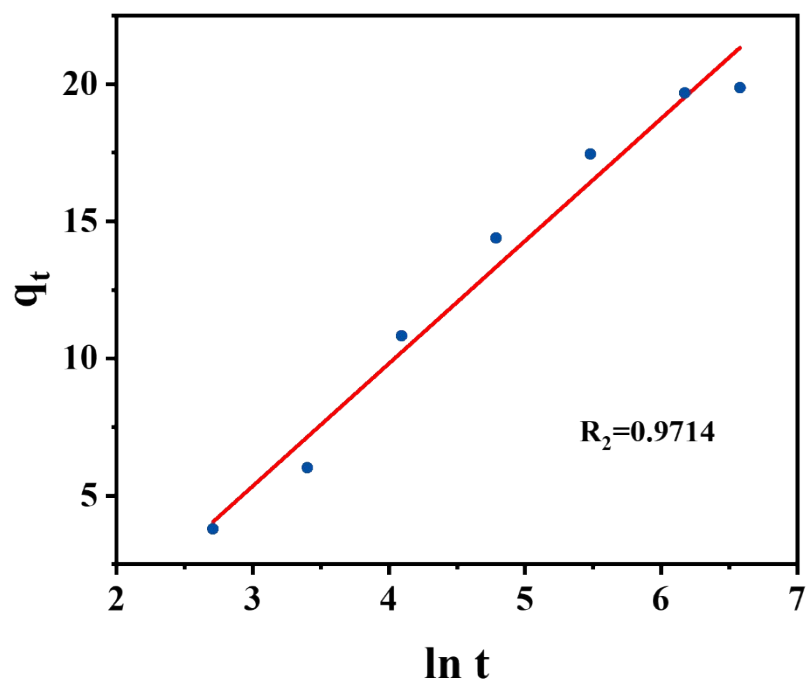

**Fig. S3** Elovich model for MB adsorption by CPOPs

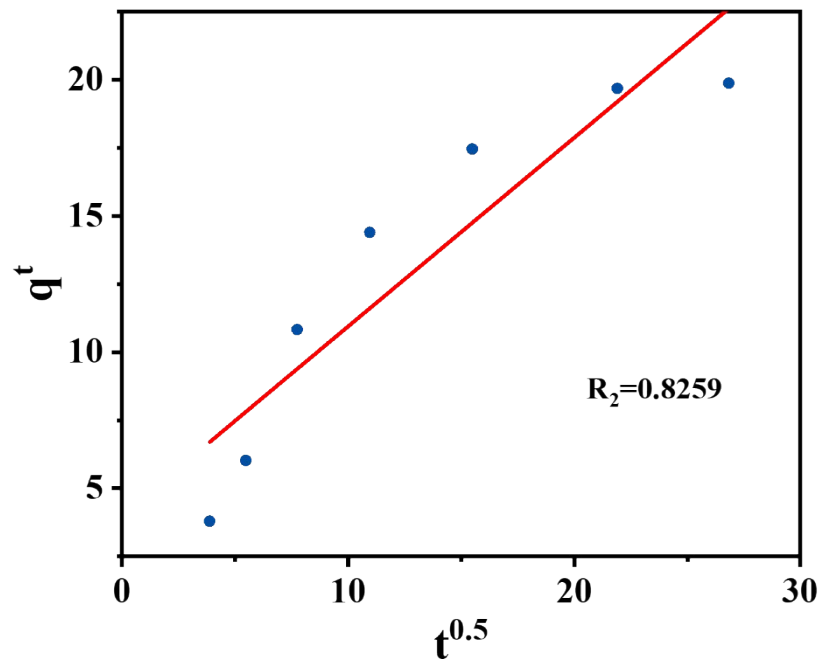

**Fig. S4** Intraparticle diffusion model for MB adsorption by CPOPs

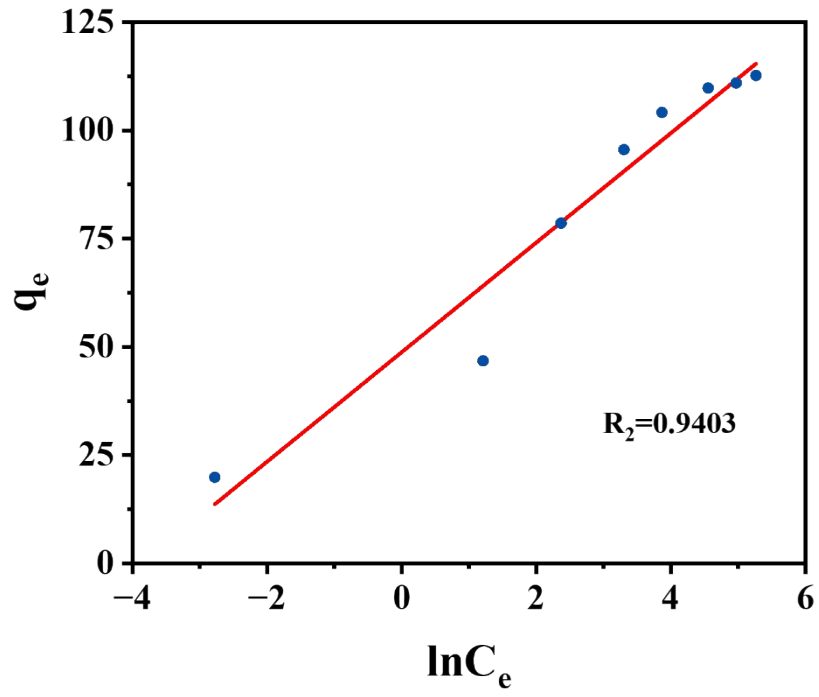

Fig. S5 Tempkin isotherm for MB adsorption by CPOPs

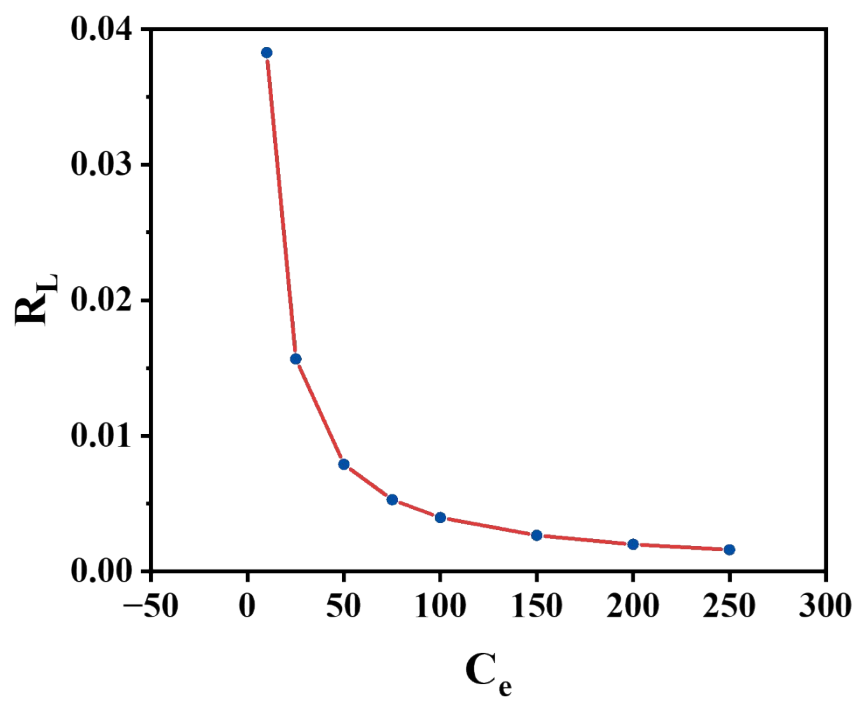

**Fig. S6**  $R_L$  with distinct initial concentrations for MB adsorption by CPOPs

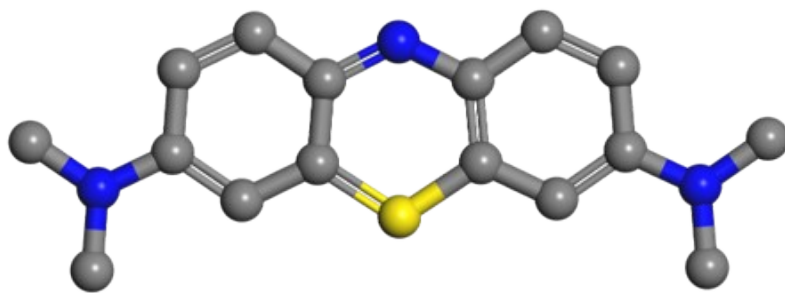

**Fig. S7** Ball-and-stick molecule model of methylene blue

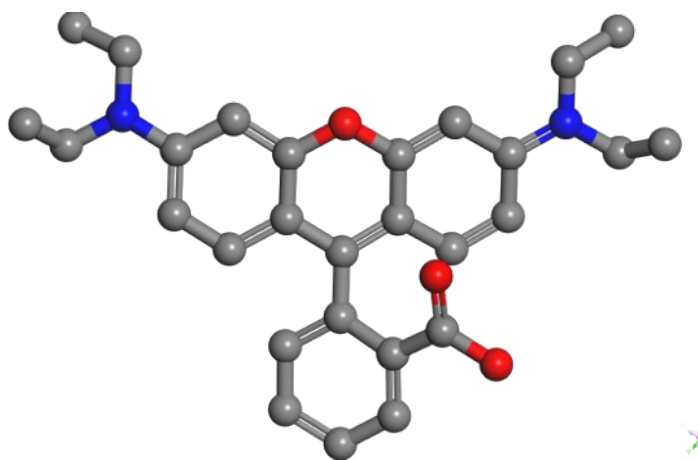

**Fig. S8** Ball-and-stick molecule model of Rhodamine B

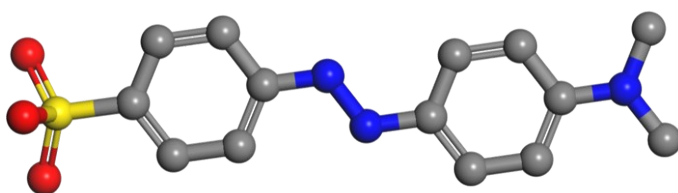

**Fig. S9** Ball-and-stick molecule model of methyl orange



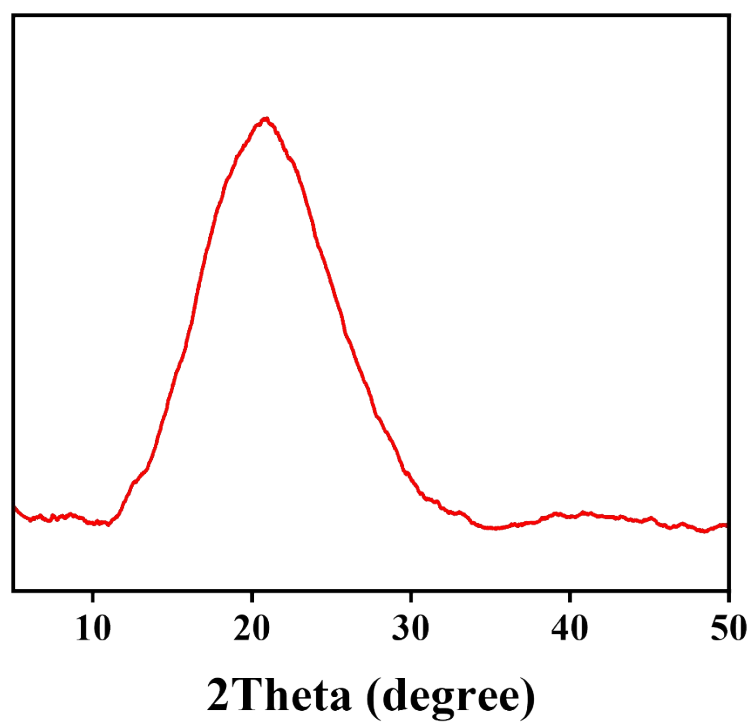

**Fig. S10** XRD curve of CPOPs after MB adsorption

The adsorption kinetics models were described as follows:

Pseudo-first-order kinetics model:  $\ln(q_e - q_t) = \ln q_e - k_1 t$  \* MERGEFORMAT (Equation.S2)

Pseudo-second-order kinetics model:  $\frac{t}{q_t} = \frac{1}{k_2 q_e^2} + \frac{t}{q_e}$  \* MERGEFORMAT (Equation.S2)

Elovich kinetics model:  $q_t = \frac{1}{\beta} \ln(\alpha\beta) + \frac{1}{\beta} \ln t$  \* MERGEFORMAT (Equation.S3)

Intraparticle diffusion kinetics model:  $q_t = k_i t^{0.5} + C_i$  \* MERGEFORMAT (Equation.S4)

Where,  $q_t$  (mg/g) and  $q_e$  (mg/g) are the adsorption capacity at a given time and at equilibrium respectively.  $k_1$  ( $\text{min}^{-1}$ ) and  $k_2$  ( $\text{g mg}^{-1} \text{min}^{-1}$ ) are the rate constants of pseudo-first-order and pseudo-second-order kinetics respectively.  $\alpha$  ( $\text{mg g}^{-1} \text{min}^{-1}$ ) is the initial adsorption rate in the chemisorption.  $\beta$  (g/mg) is a parameter that demonstrates the relation between the degree of surface coverage and activation energy in the chemisorption.  $k_i$  ( $\text{mg g}^{-1} \text{min}^{-0.5}$ ) is the constant of intraparticle diffusion.  $C_i$  is the constant of boundary layer affects and the adsorption kinetics is controlled by intraparticle diffusion diminutively when  $C_i = 0$ .

The adsorption isotherms were described as follows:

Langmuir isotherm:  $\frac{C_e}{q_e} = \frac{1}{k_L q_m} + \frac{C_e}{q_m}$  \* MERGEFORMAT

(Equation.S5)

$R_L = \frac{1}{1 + k_L C_0}$  \* MERGEFORMAT (Equation.S6)

Freundlich isotherm:  $\ln q_e = \ln k_F + \frac{1}{n} \ln C_e$  \* MERGEFORMAT

(Equation.S7)

Tempkin isotherm:  $q_e = \beta \ln k_T + \beta C_e$  \* MERGEFORMAT

(Equation.S8)

$\beta = \frac{RT}{b}$  \* MERGEFORMAT (Equation.S9)

Where,  $q_m$  (mg/g) is the theoretical maximum adsorption capacity and  $k_L$  is the constant energy relevant to the heat of adsorption calculated by Langmuir isotherms.  $C_e$  (mg/L) is the absorbate concentration in the liquid phase at equilibrium.  $q_e$  (mg/g) is the adsorption capacity at equilibrium.  $R_L$  is an essential separation factor of Langmuir isotherm defined as **Equation S6** showed. The value of  $R_L$  illustrates the type of isotherm,  $R_L > 1$  is unfavorable,  $R_L = 1$  is linear,  $1 > R_L > 0$  is favorable and  $R_L = 0$  is irreversible.

$k_F$  (mg/g) ( $\text{L/mg}$ )<sup>1/n</sup> represents the adsorption capacity while  $n$  represents the

intensity of adsorption in Freundlich theory and the favorability of the adsorption. When  $n > 1$ , the adsorption process is favorable and heterogeneous.  $\beta$  represents the heat of adsorption expressed in **Equation S9** and  $b$  is the energy constant in Tempkin isotherm.  $R$  is  $8.314 \text{ J/(K}\cdot\text{mol)}$  and  $T$  is absolute temperature.  $k_T$  is a constant of Tempkin isotherm.

The thermodynamics equations are as follows:

$$\text{Van't Hoff equation: } \ln K_c = \frac{\Delta S^0}{R} - \frac{\Delta H^0}{RT}$$

(Equation.S10)

$$K_c = \frac{q_e}{C_e} \quad \text{Equation.S11}$$

$$\Delta G^0 = -RT \ln K_c \quad \text{Equation.S12}$$

$$\text{Arrhenius equation: } k_2 = k_0 e^{-\frac{E_a}{RT}}$$

(Equation.S13)

Where,  $\Delta S^0$  ( $\text{J mol}^{-1} \text{K}^{-1}$ ) is entropy change and  $\Delta H^0$  ( $\text{J/mol}$ ) is enthalpy change.  $R$  is  $8.314 \text{ J/(K}\cdot\text{mol)}$  and  $T$  is absolute temperature.  $K_c$  ( $\text{L/g}$ ) is standard thermodynamic equilibrium constant expressed in **equation S11**, where  $C_e$  ( $\text{mg/L}$ ) is the adsorbate concentration in the liquid phase at equilibrium and  $q_e$  ( $\text{mg/g}$ ) is the adsorption capacity at equilibrium.  $\Delta G^0$  ( $\text{J/mol}$ ) is Gibbs free energy change and can be calculated by **Equation S12**.
